# Supplementary material
Source: PubMed Central journal article supplement (PMC7107693)
Supplement: NIHMS1048153-supplement-Supple_emtary_INformation.pdf [file NIHMS1048153-supplement-Supple_emtary_INformation.pdf]

A pH-correctable, DNA-based fluorescent reporter for organellar Calcium

Nagarjun Narayanaswamy<sup>#1,2</sup>, Kasturi Chakraborty<sup>#1,2\*</sup>, Anand Saminathan<sup>1,2</sup>, Elizabeth Zeichner<sup>1</sup>, KaHo Leung<sup>1,2</sup>, John Devany<sup>3</sup>, Yamuna Krishnan<sup>1,2\*</sup>

<sup>1</sup>*Department of Chemistry, The University of Chicago, Chicago, Illinois 60637, USA.*

<sup>2</sup>*Grossman Institute of Neuroscience, Quantitative Biology and Human Behavior, The University of Chicago, Chicago, Illinois 60637, USA.*

<sup>3</sup>*Department of Physics, The University of Chicago, IL, 60637, USA*

*#These authors contributed equally to this work.*

*\*Corresponding authors. Email:[yamuna@uchicago.edu](mailto:yamuna@uchicago.edu); [kasturi@uchicago.edu](mailto:kasturi@uchicago.edu)*

### Scheme 1: Synthesis of Rhod-5F

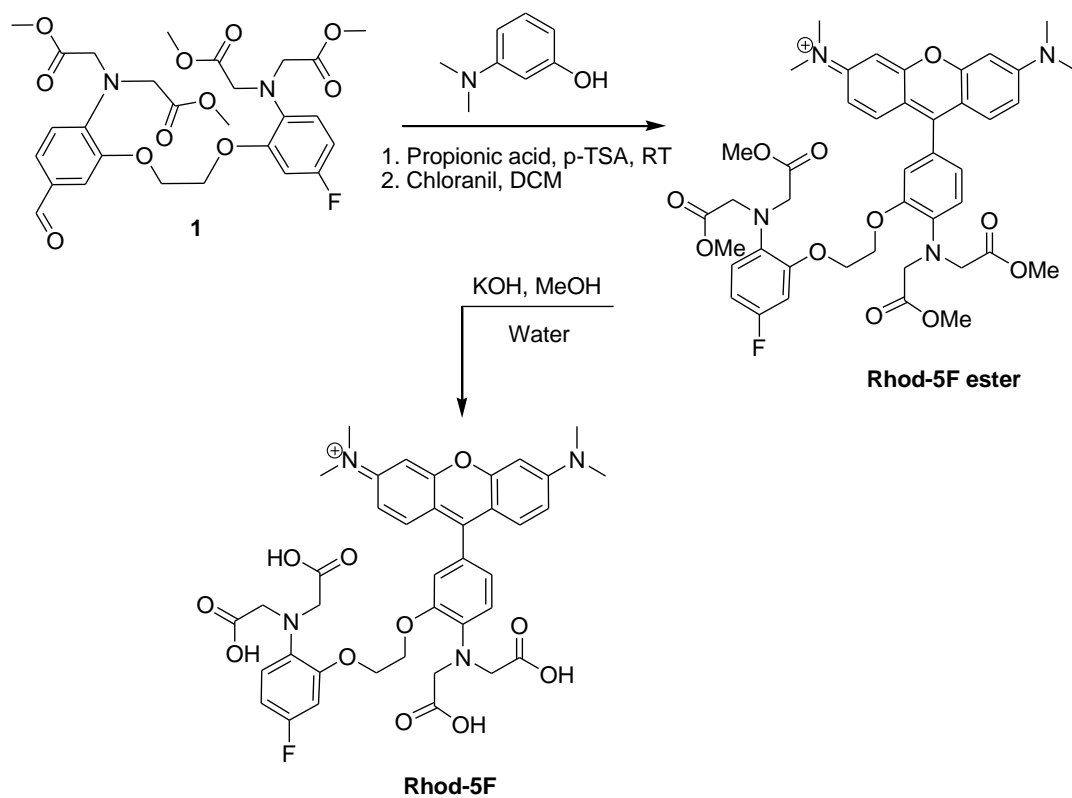

### Scheme 2: Synthesis of 3-((3-azidopropyl)(methyl)amino)phenol (**3**).

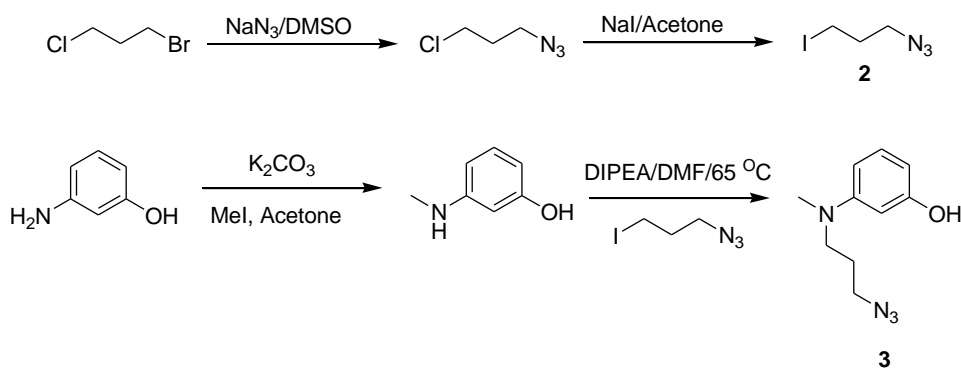

### Scheme 3: Synthesis of Rhod-5F-N<sub>3</sub>

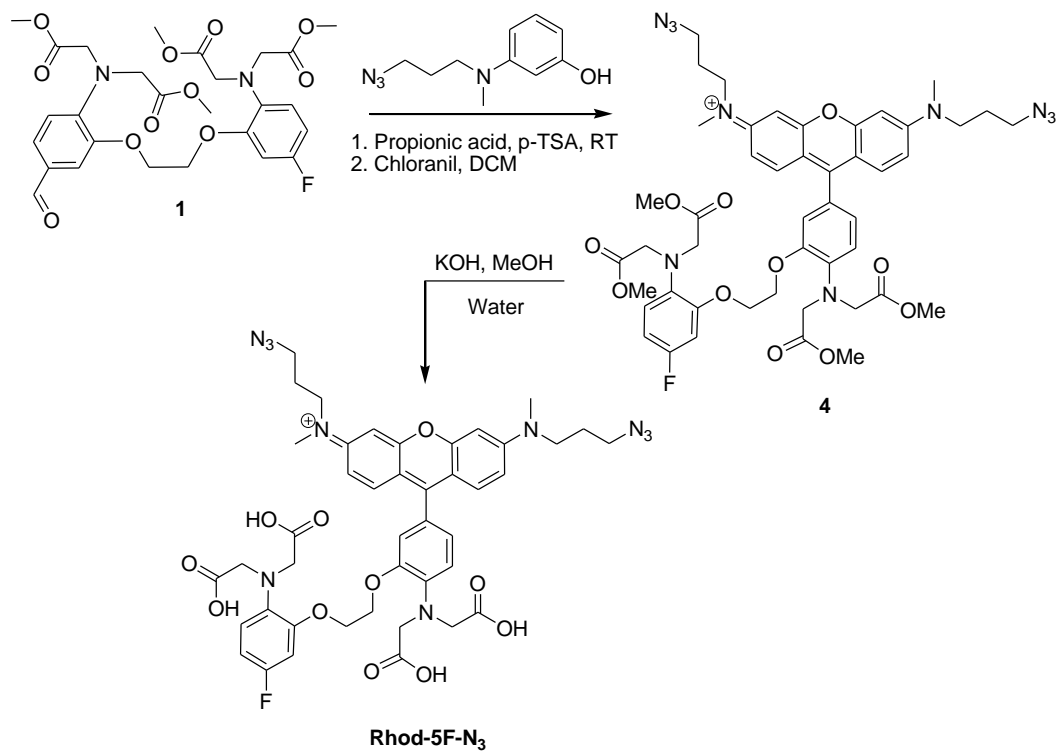

**Table S1.** Sequences used to form *CalipHluor*, *CalipHluor<sub>Ly</sub>* and *CalipHluor<sup>mLy</sup>*. D1 and D2 were used to form *CalipHluor<sub>Ly</sub>*; OG-D1 and D2 were used to form *CalipHluor<sup>mLy</sup>*. Bromo cytosines in D1 are underlined and highlighted in red. O1-A488, O2-A647 and O3 strands were used to form *CalipHluor*. Complimentary sequences are highlighted in matching colors.

| Strand  | Sequence information                                                                                                             |
|---------|----------------------------------------------------------------------------------------------------------------------------------|
| D1      | 5'-Alexa 488- <u>CC</u> C CTA <u>AC</u> C CCT AAC <u>CC</u> C TAA <u>CC</u> C CAT ATA TAT CCT AGA ACG ACA GAC AAA CAG TGA GTC-3' |
| D2      | 5'-DBCO-GAC TCA CTG TTT GTC TGT CGT TCT AGG ATA /iAlexa 647N/AT ATT TTG TTA TGT GTT ATG TGT TAT-3'                               |
| O1-A488 | 5'-Alexa-488-CCCCAACCCCAATACATTTTACGCCTGGTGCC-3'                                                                                 |
| O2-A647 | 5'- <u>CCGACCGCAGGATCCTATA</u> AAACCCCAACCCC-Alexa 647-3'                                                                        |
| O3-DBCO | 5'- <u>TTA TAG GAT CCT GCG GTC GG</u> /iDBCON/ <u>GGC ACC AGG CGT AAA ATG TA</u> -3'                                             |
| OG-D1   | 5'-Oregon Green-AT AAC ACA TAA CAC ATA ACA AAA TAT ATA TCC TAG AAC GAC AGA CAA ACA GTG AGT C-3'                                  |

**Table S2:** Amount of free [Ca<sup>2+</sup>] in clamping buffer at pH 5.5 was calculated using Maxchelator software.

| Added calcium (μM) | Amount calcium added (μL) | Concentration of calcium added | Free [Ca <sup>2+</sup> ] (μM) in 50 μL |
|--------------------|---------------------------|--------------------------------|----------------------------------------|
| 0                  | 0                         | 0                              | 0                                      |
| 1                  | 1                         | 50 μM                          | 3.89 E-2                               |
| 2                  | 2                         | 50 μM                          | 7.80 E-2                               |
| 10                 | 1                         | 0.5 mM                         | 3.89 E-1                               |
| 20                 | 2                         | 0.5 mM                         | 7.80 E-1                               |
| 50                 | 1                         | 2.5 mM                         | 1.9                                    |
| 100                | 2                         | 2.5 mM                         | 3.9                                    |
| 200                | 1                         | 10 mM                          | 7.9                                    |
| 500                | 1                         | 25 mM                          | 20.4                                   |
| 1E3                | 1                         | 50 mM                          | 43.1                                   |
| 2E3                | 2                         | 50 mM                          | 96.3                                   |
| 5E3                | 1                         | 250 mM                         | 360.3                                  |
| 10E3               | 2                         | 250 mM                         | 1.86 E3                                |
| 20E3               | 2                         | 500 mM                         | 10.4 E03                               |

**Table S3:** Mean pH and free [Ca<sup>2+</sup>] in EE, LE and Ly of wild type (N2) worms, lysosomes of *catp-6*, *cup-5* +/- and *catp-6* RNAi in *cup-5* +/- worms using *CalipHluor*<sub>Ly</sub>.

| Worm                                  | pH          | Free [Ca <sup>2+</sup> ] (μM) |
|---------------------------------------|-------------|-------------------------------|
| EE of N2                              | 6.46 ± 0.07 | 0.3 ± 0.1                     |
| LE of N2                              | 5.95 ± 0.02 | 0.3 ± 0.1                     |
| Ly of N2                              | 5.30 ± 0.02 | 11 ± 0.8                      |
| Ly of <i>catp-6</i>                   | 5.47 ± 0.03 | 1.6 ± 0.4                     |
| Ly of <i>cup-5</i> +/-                | 5.15 ± 0.01 | 40 ± 1.5                      |
| Ly of CATP-6 RNAi in <i>cup-5</i> +/- | 5.50 ± 0.10 | 16 ± 4.9                      |

Early endosome (EE), Late endosome (LE) and Lysosomes (Ly)

For all experiments n = 15 cells, 50 endosomes; data represent the mean ± s.e.m. Experiments were repeated thrice independently with similar results.
